# Supplementary material for: miRNA-182-5p, via HIF2α, contributes to arsenic carcinogenesis: evidence from human renal epithelial cells
Source: Royal Society of Chemistry journal article supplement (doi:10.1039/c8mt00251g), 2018-01-01
Supplement: c8mt00251g1.pdf [file c8mt00251g1.pdf]

Table S1 Primer sequences for RT-PCR

| Gene               | Primers (5'→3')                                                     |
|--------------------|---------------------------------------------------------------------|
| <i>B-ACTIN</i>     | Forward: GAGCACAGAGCCTCGCCTTT<br>Reverse: TCATCATCCATGGTGAGCTGG     |
| <i>RPS18</i>       | Forward: TAGCCAATGGTCTGGACAACA<br>Reverse: CCTCTATGGGCCCGAATCTT     |
| <i>HIF1α</i>       | Forward: TGCTTGGTGCTGATTTGTGA<br>Reverse: GGTCAGATGATCAGAGTCCA      |
| <i>HIF2α</i>       | Forward: TGCGACTGGCAATCAGCT<br>Reverse: CACCACGGCAATGAAACC          |
| <i>CPT1A</i>       | Forward: GGCAAGTTTTGCCTCACATACG<br>Reverse: GAACAACCTTCAGCCTCTGTTCC |
| <i>U6</i>          | CTCGCTTCGGCAGCACA                                                   |
| <i>miR-1271-5p</i> | CTTGGCACCTAGCAAGCACTCA                                              |
| <i>miR-142-5p</i>  | CATAA AGTAGA AAGCACTACTGGGGGC                                       |
| <i>miR-152-3p</i>  | TCAGTGCATGACAGA ACTTGGGG                                            |
| <i>miR-182-5p</i>  | TTTGGCAATGGTAGA ACTCACACTGG                                         |
| <i>miR-802</i>     | GGGCAGTAACAA AGATTCATCCTTGT                                         |
| <i>miR-9-5p</i>    | TCTTTGGTTATCTAGCTGTATGAGGGG                                         |
| <i>miR-96-5p</i>   | TTTGGCACTAGCACATTTTTGCTGC                                           |
| <i>miR-373-3p</i>  | GAAGTGCTTCGATTTTGGGGTGTG                                            |
| <i>miR-383-5p</i>  | AGATCAGAAGGTGATTGTGGCTG                                             |
| <i>miR-23-3p</i>   | ATCACATTGCCAGGGATTTCCC                                              |
| <i>miR-26-5p</i>   | TTCAAGTAATCCAGGATAGGCTCC                                            |
| <i>miR-27-3p</i>   | TTCACAGTGGCTAAGTTCCGC                                               |
